# Supplementary material for: Association of Daily Exposure to Air Pollutants with the Risk of Tuberculosis in Xuhui District of Shanghai, China
Source: MDPI journal article supplement (doi:10.3390/ijerph19106085), 2022-05-17
Supplement: s1 [file s1]

## Supplementary Materials

### Association of Daily Exposure to Air Pollutants with the Risk of Tuberculosis in Xuhui District of Shanghai, China

Ying Xiong <sup>1,2,3</sup>, Meixia Yang <sup>4,\*</sup>, Zhengzhong Wang <sup>1,2,3</sup>, Honglin Jiang <sup>1,2,3</sup>, Ning Xu <sup>1,2,3</sup>, Yixin Tong <sup>1,2,3</sup>, Jiangfan Yin <sup>1,2,3</sup>, Yue Chen <sup>5</sup>, Qingwu Jiang <sup>1,2,3</sup> and Yibiao Zhou <sup>1,2,3,\*</sup>

- <sup>1</sup> School of Public Health, Fudan University, Building 8, 130 Dong'an Road, Shanghai 200032, China; 20211020140@fudan.edu.cn (Y.X.); 20211020023@fudan.edu.cn (Z.W.); hljiang20@fudan.edu.cn (H.J.); 21111020043@m.fudan.edu.cn (N.X.); 21211020016@m.fudan.edu.cn (Y.T.); 21211020154@m.fudan.edu.cn (J.Y.); jiangqw@fudan.edu.cn (Q.J.)
- <sup>2</sup> Key Laboratory of Public Health Safety, Fudan University, Ministry of Education, Building 8, 130 Dong'an Road, Shanghai 200032, China
- <sup>3</sup> Center for Tropical Disease Research, Fudan University, Building 8, 130 Dong'an Road, Shanghai 200032, China
- <sup>4</sup> Xuhui Center for Disease Control and Prevention, Shanghai 200237, China
- <sup>5</sup> School of Epidemiology and Public Health, Faculty of Medicine, University of Ottawa, 451 Smyth Road, Ottawa, ON K1H 8M5, Canada; ychen@uottawa.ca
- \* Correspondence: ymeixia@sina.com (M.Y.); ybzhou@fudan.edu.cn (Y.Z.)

1. Results of the analyses of the modification effect.

**Table S1.** The effect modification between sulfur dioxide (SO<sub>2</sub>) and TB cases by gender, age, and season.

|            | Gender                | Age                   | Season                |
|------------|-----------------------|-----------------------|-----------------------|
| Difference | -0.057(-0.151, 0.037) | -0.058(-0.195, 0.079) | -0.032(-0.108, 0.044) |

**Table S2.** The effect modification between nitrogen dioxide (NO<sub>2</sub>) and TB cases by gender, age, and season.

|            | Gender                | Age                   | Season               |
|------------|-----------------------|-----------------------|----------------------|
| Difference | -0.023(-0.118, 0.072) | -0.074(-0.184, 0.036) | 0.004(-0.091, 0.099) |

**Table S3.** The effect modification between particulate matter with an aerodynamic diameter less than 2.5 µm (PM<sub>2.5</sub>) and TB cases by gender, age, and season.

|            | Gender                | Age                    | Season                 |
|------------|-----------------------|------------------------|------------------------|
| Difference | -0.124(-0.251, 0.003) | -0.183(-0.346, -0.020) | -0.311(-0.510, -0.112) |

**Table S4.** The effect modification between carbon monoxide (CO) and TB cases by gender, age, and season.

|            | Gender                | Age                  | Season              |
|------------|-----------------------|----------------------|---------------------|
| Difference | -0.042(-0.093, 0.009) | 0.051(-0.009, 0.111) | 0.105(0.011, 0.199) |

**Table S5.** The effect modification between ozone (O<sub>3</sub>) and TB cases by gender, age, and season.

|            | Gender               | Age                   | Season                |
|------------|----------------------|-----------------------|-----------------------|
| Difference | 0.021(-0.045, 0.087) | -0.002(-0.084, 0.080) | -0.013(-0.107, 0.081) |

## 2. Sensitivity analyses

**Table S6.** The sensitivity analysis about the multipollutant model for SO<sub>2</sub>.

| Lag   | Lag-specific relative risk |              |              | Cumulative relative risk |              |              |
|-------|----------------------------|--------------|--------------|--------------------------|--------------|--------------|
|       | RR                         | LCI          | UCI          | RR                       | LCI          | UCI          |
| lag0  | 1.011                      | 0.931        | 1.098        | 1.011                    | 0.931        | 1.098        |
| lag1  | 1.048                      | 0.997        | 1.101        | 1.059                    | 0.932        | 1.204        |
| lag2  | <b>1.071</b>               | <b>1.026</b> | <b>1.118</b> | 1.134                    | 0.972        | 1.324        |
| lag3  | <b>1.077</b>               | <b>1.03</b>  | <b>1.126</b> | <b>1.222</b>             | <b>1.023</b> | <b>1.46</b>  |
| lag4  | <b>1.071</b>               | <b>1.027</b> | <b>1.117</b> | <b>1.308</b>             | <b>1.068</b> | <b>1.602</b> |
| lag5  | <b>1.058</b>               | <b>1.02</b>  | <b>1.098</b> | <b>1.385</b>             | <b>1.103</b> | <b>1.739</b> |
| lag6  | <b>1.045</b>               | <b>1.012</b> | <b>1.079</b> | <b>1.447</b>             | <b>1.126</b> | <b>1.86</b>  |
| lag7  | <b>1.034</b>               | <b>1.003</b> | <b>1.065</b> | <b>1.496</b>             | <b>1.139</b> | <b>1.964</b> |
| lag8  | 1.024                      | 0.995        | 1.054        | <b>1.532</b>             | <b>1.144</b> | <b>2.052</b> |
| lag9  | 1.016                      | 0.988        | 1.046        | <b>1.557</b>             | <b>1.142</b> | <b>2.124</b> |
| lag10 | 1.01                       | 0.982        | 1.039        | <b>1.573</b>             | <b>1.133</b> | <b>2.184</b> |
| lag11 | 1.005                      | 0.978        | 1.033        | <b>1.581</b>             | <b>1.119</b> | <b>2.232</b> |
| lag12 | 1.001                      | 0.975        | 1.028        | <b>1.583</b>             | <b>1.102</b> | <b>2.272</b> |
| lag13 | 0.998                      | 0.974        | 1.023        | <b>1.58</b>              | <b>1.084</b> | <b>2.304</b> |
| lag14 | 0.997                      | 0.974        | 1.02         | <b>1.575</b>             | <b>1.064</b> | <b>2.331</b> |
| lag15 | 0.996                      | 0.975        | 1.017        | <b>1.568</b>             | <b>1.046</b> | <b>2.352</b> |
| lag16 | 0.996                      | 0.976        | 1.015        | <b>1.561</b>             | <b>1.029</b> | <b>2.37</b>  |
| lag17 | 0.996                      | 0.977        | 1.015        | <b>1.555</b>             | <b>1.014</b> | <b>2.385</b> |
| lag18 | 0.997                      | 0.977        | 1.017        | <b>1.55</b>              | <b>1.001</b> | <b>2.399</b> |
| lag19 | 0.998                      | 0.976        | 1.02         | 1.547                    | 0.992        | 2.414        |
| lag20 | 0.999                      | 0.974        | 1.025        | 1.546                    | 0.984        | 2.43         |
| lag21 | 1.001                      | 0.972        | 1.031        | 1.548                    | 0.978        | 2.45         |

RR: relative risk; UCI: upper confidence interval; LCI: lower confidence interval; SO<sub>2</sub>: sulfur dioxide.

**Bold:** P<0.05

**Table S7.** The sensitivity analysis about the multipollutant model for NO<sub>2</sub>.

| Lag   | Lag-specific relative risk |              |              | Cumulative relative risk |              |              |
|-------|----------------------------|--------------|--------------|--------------------------|--------------|--------------|
|       | RR                         | LCI          | UCI          | RR                       | LCI          | UCI          |
| lag0  | 1.003                      | 0.925        | 1.088        | 1.003                    | 0.925        | 1.088        |
| lag1  | 1.026                      | 0.976        | 1.077        | 1.029                    | 0.907        | 1.167        |
| lag2  | 1.043                      | 0.996        | 1.091        | 1.073                    | 0.921        | 1.25         |
| lag3  | <b>1.053</b>               | <b>1.003</b> | <b>1.105</b> | 1.129                    | 0.944        | 1.35         |
| lag4  | <b>1.057</b>               | <b>1.01</b>  | <b>1.107</b> | 1.193                    | 0.97         | 1.469        |
| lag5  | <b>1.057</b>               | <b>1.015</b> | <b>1.101</b> | 1.262                    | 0.996        | 1.599        |
| lag6  | <b>1.056</b>               | <b>1.017</b> | <b>1.096</b> | <b>1.332</b>             | <b>1.023</b> | <b>1.734</b> |
| lag7  | <b>1.053</b>               | <b>1.015</b> | <b>1.092</b> | <b>1.402</b>             | <b>1.05</b>  | <b>1.874</b> |
| lag8  | <b>1.049</b>               | <b>1.011</b> | <b>1.089</b> | <b>1.471</b>             | <b>1.074</b> | <b>2.016</b> |
| lag9  | <b>1.044</b>               | <b>1.006</b> | <b>1.085</b> | <b>1.537</b>             | <b>1.094</b> | <b>2.159</b> |
| lag10 | 1.039                      | 1            | 1.079        | <b>1.596</b>             | <b>1.108</b> | <b>2.301</b> |
| lag11 | 1.033                      | 0.994        | 1.073        | <b>1.648</b>             | <b>1.114</b> | <b>2.438</b> |
| lag12 | 1.026                      | 0.988        | 1.065        | <b>1.69</b>              | <b>1.113</b> | <b>2.566</b> |
| lag13 | 1.018                      | 0.982        | 1.056        | <b>1.721</b>             | <b>1.104</b> | <b>2.68</b>  |
| lag14 | 1.01                       | 0.975        | 1.046        | <b>1.738</b>             | <b>1.088</b> | <b>2.776</b> |
| lag15 | 1.001                      | 0.968        | 1.036        | <b>1.74</b>              | <b>1.063</b> | <b>2.847</b> |
| lag16 | 0.992                      | 0.96         | 1.026        | <b>1.727</b>             | <b>1.032</b> | <b>2.89</b>  |
| lag17 | 0.983                      | 0.951        | 1.017        | 1.698                    | 0.993        | 2.904        |
| lag18 | 0.974                      | 0.939        | 1.01         | 1.654                    | 0.948        | 2.887        |
| lag19 | 0.965                      | 0.927        | 1.004        | 1.596                    | 0.896        | 2.842        |
| lag20 | 0.955                      | 0.913        | 0.999        | 1.524                    | 0.838        | 2.771        |
| lag21 | 0.946                      | 0.899        | 0.995        | 1.441                    | 0.775        | 2.68         |

RR: relative risk; UCI: upper confidence interval; LCI: lower confidence interval; NO<sub>2</sub>: nitrogen dioxide.

**Bold:** P<0.05

**Table S8.** The sensitivity analysis about the multipollutant model for PM<sub>2.5</sub>.

| Lag   | Lag-specific relative risk |       |       | Cumulative relative risk |       |       |
|-------|----------------------------|-------|-------|--------------------------|-------|-------|
|       | RR                         | LCI   | UCI   | RR                       | LCI   | UCI   |
| lag0  | 0.966                      | 0.81  | 1.152 | 0.966                    | 0.81  | 1.152 |
| lag1  | 1.015                      | 0.918 | 1.122 | 0.981                    | 0.749 | 1.284 |
| lag2  | 1.051                      | 0.971 | 1.137 | 1.03                     | 0.752 | 1.413 |
| lag3  | 1.067                      | 0.983 | 1.159 | 1.1                      | 0.774 | 1.562 |
| lag4  | 1.071                      | 0.99  | 1.158 | 1.177                    | 0.798 | 1.738 |
| lag5  | 1.066                      | 0.995 | 1.142 | 1.255                    | 0.816 | 1.931 |
| lag6  | 1.06                       | 0.995 | 1.128 | 1.33                     | 0.83  | 2.132 |
| lag7  | 1.055                      | 0.992 | 1.121 | 1.403                    | 0.841 | 2.34  |
| lag8  | 1.051                      | 0.988 | 1.117 | 1.474                    | 0.849 | 2.558 |
| lag9  | 1.048                      | 0.984 | 1.116 | 1.544                    | 0.854 | 2.791 |
| lag10 | 1.046                      | 0.981 | 1.114 | 1.614                    | 0.857 | 3.041 |
| lag11 | 1.044                      | 0.98  | 1.113 | 1.686                    | 0.858 | 3.314 |
| lag12 | 1.044                      | 0.981 | 1.111 | 1.76                     | 0.858 | 3.611 |
| lag13 | 1.044                      | 0.983 | 1.109 | 1.838                    | 0.859 | 3.934 |
| lag14 | 1.045                      | 0.987 | 1.108 | 1.922                    | 0.861 | 4.286 |
| lag15 | 1.047                      | 0.99  | 1.107 | 2.012                    | 0.867 | 4.668 |
| lag16 | 1.049                      | 0.992 | 1.109 | 2.11                     | 0.875 | 5.084 |
| lag17 | 1.051                      | 0.993 | 1.113 | 2.218                    | 0.888 | 5.539 |
| lag18 | 1.054                      | 0.991 | 1.121 | 2.337                    | 0.904 | 6.043 |
| lag19 | 1.057                      | 0.986 | 1.132 | 2.47                     | 0.923 | 6.609 |
| lag20 | 1.06                       | 0.98  | 1.147 | 2.618                    | 0.944 | 7.26  |
| lag21 | 1.063                      | 0.972 | 1.163 | 2.784                    | 0.965 | 8.029 |

RR: relative risk; UCI: upper confidence interval; LCI: lower confidence interval; PM<sub>2.5</sub>: particulate matter less than 2.5 µm in aerodynamic diameter.

**Bold:** P<0.05

**Table S9.** The sensitivity analysis about the multipollutant model for CO.

| Lag   | Lag-specific relative risk |              |              | Cumulative relative risk |              |              |
|-------|----------------------------|--------------|--------------|--------------------------|--------------|--------------|
|       | RR                         | LCI          | UCI          | RR                       | LCI          | UCI          |
| lag0  | 1.004                      | 0.93         | 1.084        | 1.004                    | 0.93         | 1.084        |
| lag1  | 1.011                      | 0.968        | 1.055        | 1.015                    | 0.904        | 1.139        |
| lag2  | 1.017                      | 0.98         | 1.055        | 1.032                    | 0.902        | 1.182        |
| lag3  | 1.022                      | 0.982        | 1.063        | 1.055                    | 0.907        | 1.227        |
| lag4  | 1.025                      | 0.988        | 1.064        | 1.082                    | 0.912        | 1.282        |
| lag5  | 1.028                      | 0.996        | 1.06         | 1.112                    | 0.92         | 1.343        |
| lag6  | <b>1.029</b>               | <b>1.002</b> | <b>1.058</b> | 1.145                    | 0.931        | 1.407        |
| lag7  | <b>1.03</b>                | <b>1.004</b> | <b>1.057</b> | 1.179                    | 0.944        | 1.473        |
| lag8  | <b>1.03</b>                | <b>1.004</b> | <b>1.058</b> | 1.215                    | 0.959        | 1.54         |
| lag9  | <b>1.03</b>                | <b>1.003</b> | <b>1.058</b> | 1.251                    | 0.973        | 1.61         |
| lag10 | <b>1.029</b>               | <b>1.001</b> | <b>1.057</b> | 1.287                    | 0.986        | 1.682        |
| lag11 | 1.027                      | 0.999        | 1.056        | 1.322                    | 0.996        | 1.754        |
| lag12 | 1.025                      | 0.997        | 1.053        | <b>1.355</b>             | <b>1.004</b> | <b>1.827</b> |
| lag13 | 1.022                      | 0.995        | 1.049        | <b>1.385</b>             | <b>1.01</b>  | <b>1.899</b> |
| lag14 | 1.019                      | 0.993        | 1.045        | <b>1.411</b>             | <b>1.012</b> | <b>1.967</b> |
| lag15 | 1.016                      | 0.991        | 1.041        | <b>1.433</b>             | <b>1.011</b> | <b>2.03</b>  |
| lag16 | 1.012                      | 0.987        | 1.037        | <b>1.45</b>              | <b>1.008</b> | <b>2.086</b> |
| lag17 | 1.008                      | 0.982        | 1.034        | 1.461                    | 1            | 2.134        |
| lag18 | 1.004                      | 0.975        | 1.033        | 1.466                    | 0.989        | 2.175        |
| lag19 | 0.999                      | 0.967        | 1.033        | 1.466                    | 0.973        | 2.208        |
| lag20 | 0.995                      | 0.958        | 1.033        | 1.458                    | 0.952        | 2.235        |
| lag21 | 0.991                      | 0.948        | 1.035        | 1.445                    | 0.924        | 2.259        |

RR: relative risk; UCI: upper confidence interval; LCI: lower confidence interval; CO: carbon monoxide.

**Bold:** P<0.05

**Table S10.** The sensitivity analysis about the multipollutant model for O<sub>3</sub>.

| Lag   | Lag-specific relative risk |              |              | Cumulative relative risk |       |       |
|-------|----------------------------|--------------|--------------|--------------------------|-------|-------|
|       | RR                         | LCI          | UCI          | RR                       | LCI   | UCI   |
| lag0  | 1.032                      | 0.975        | 1.092        | 1.032                    | 0.975 | 1.092 |
| lag1  | 1.007                      | 0.976        | 1.039        | 1.039                    | 0.955 | 1.131 |
| lag2  | 0.991                      | 0.965        | 1.019        | 1.03                     | 0.933 | 1.137 |
| lag3  | 0.985                      | 0.957        | 1.015        | 1.015                    | 0.909 | 1.133 |
| lag4  | 0.986                      | 0.959        | 1.014        | 1.001                    | 0.884 | 1.133 |
| lag5  | 0.991                      | 0.968        | 1.014        | 0.991                    | 0.864 | 1.138 |
| lag6  | 0.995                      | 0.975        | 1.016        | 0.987                    | 0.848 | 1.148 |
| lag7  | 0.999                      | 0.979        | 1.019        | 0.985                    | 0.837 | 1.16  |
| lag8  | 1.001                      | 0.981        | 1.022        | 0.986                    | 0.829 | 1.174 |
| lag9  | 1.002                      | 0.981        | 1.024        | 0.989                    | 0.821 | 1.19  |
| lag10 | 1.002                      | 0.981        | 1.024        | 0.991                    | 0.814 | 1.207 |
| lag11 | 1.002                      | 0.98         | 1.023        | 0.993                    | 0.806 | 1.223 |
| lag12 | 1                          | 0.979        | 1.021        | 0.993                    | 0.796 | 1.238 |
| lag13 | 0.998                      | 0.978        | 1.018        | 0.99                     | 0.785 | 1.249 |
| lag14 | 0.994                      | 0.976        | 1.014        | 0.985                    | 0.772 | 1.257 |
| lag15 | 0.991                      | 0.973        | 1.01         | 0.976                    | 0.756 | 1.258 |
| lag16 | 0.987                      | 0.968        | 1.005        | 0.963                    | 0.739 | 1.254 |
| lag17 | 0.982                      | 0.963        | 1.002        | 0.945                    | 0.719 | 1.243 |
| lag18 | <b>0.977</b>               | <b>0.956</b> | <b>0.999</b> | 0.924                    | 0.697 | 1.225 |
| lag19 | <b>0.972</b>               | <b>0.947</b> | <b>0.998</b> | 0.898                    | 0.672 | 1.202 |
| lag20 | <b>0.967</b>               | <b>0.938</b> | <b>0.996</b> | 0.869                    | 0.643 | 1.174 |
| lag21 | <b>0.962</b>               | <b>0.929</b> | <b>0.996</b> | 0.836                    | 0.611 | 1.143 |

RR: relative risk; UCI: upper confidence interval; LCI: lower confidence interval; O<sub>3</sub>: ozone.**Bold:** P<0.05

**Table S11.** The sensitivity analysis about the changes of *df* for meteorological factors (1-5) for SO<sub>2</sub>.

| Lag   | df=1         |              |              | df=2         |              |              | df=3         |              |              | df=4         |              |              | df=5         |              |              |
|-------|--------------|--------------|--------------|--------------|--------------|--------------|--------------|--------------|--------------|--------------|--------------|--------------|--------------|--------------|--------------|
|       | RR           | LCI          | UCI          |
| lag0  | 1.003        | 0.927        | 1.086        | 1.004        | 0.928        | 1.087        | 1.001        | 0.925        | 1.083        | 1.006        | 0.929        | 1.089        | 1.005        | 0.929        | 1.088        |
| lag1  | 1.046        | 0.997        | 1.097        | 1.048        | 0.999        | 1.1          | 1.044        | 0.995        | 1.095        | 1.048        | 0.999        | 1.1          | 1.048        | 0.999        | 1.1          |
| lag2  | <b>1.074</b> | <b>1.031</b> | <b>1.119</b> | <b>1.077</b> | <b>1.034</b> | <b>1.123</b> | <b>1.072</b> | <b>1.028</b> | <b>1.118</b> | <b>1.076</b> | <b>1.033</b> | <b>1.121</b> | <b>1.076</b> | <b>1.032</b> | <b>1.121</b> |
| lag3  | <b>1.082</b> | <b>1.037</b> | <b>1.129</b> | <b>1.086</b> | <b>1.04</b>  | <b>1.133</b> | <b>1.081</b> | <b>1.035</b> | <b>1.129</b> | <b>1.084</b> | <b>1.038</b> | <b>1.131</b> | <b>1.083</b> | <b>1.038</b> | <b>1.131</b> |
| lag4  | <b>1.076</b> | <b>1.034</b> | <b>1.12</b>  | <b>1.08</b>  | <b>1.037</b> | <b>1.124</b> | <b>1.076</b> | <b>1.032</b> | <b>1.121</b> | <b>1.077</b> | <b>1.035</b> | <b>1.122</b> | <b>1.077</b> | <b>1.034</b> | <b>1.122</b> |
| lag5  | <b>1.063</b> | <b>1.026</b> | <b>1.101</b> | <b>1.066</b> | <b>1.029</b> | <b>1.104</b> | <b>1.063</b> | <b>1.026</b> | <b>1.101</b> | <b>1.064</b> | <b>1.027</b> | <b>1.102</b> | <b>1.064</b> | <b>1.026</b> | <b>1.102</b> |
| lag6  | <b>1.049</b> | <b>1.017</b> | <b>1.082</b> | <b>1.051</b> | <b>1.019</b> | <b>1.084</b> | <b>1.049</b> | <b>1.017</b> | <b>1.082</b> | <b>1.049</b> | <b>1.017</b> | <b>1.083</b> | <b>1.049</b> | <b>1.017</b> | <b>1.082</b> |
| lag7  | <b>1.037</b> | <b>1.008</b> | <b>1.068</b> | <b>1.038</b> | <b>1.009</b> | <b>1.069</b> | <b>1.037</b> | <b>1.007</b> | <b>1.068</b> | <b>1.037</b> | <b>1.008</b> | <b>1.067</b> | <b>1.037</b> | <b>1.007</b> | <b>1.067</b> |
| lag8  | 1.027        | 0.999        | 1.056        | 1.028        | 1            | 1.057        | 1.027        | 0.998        | 1.057        | 1.027        | 0.999        | 1.056        | 1.026        | 0.998        | 1.055        |
| lag9  | 1.019        | 0.991        | 1.047        | 1.019        | 0.992        | 1.047        | 1.019        | 0.99         | 1.049        | 1.018        | 0.991        | 1.047        | 1.018        | 0.99         | 1.046        |
| lag10 | 1.012        | 0.985        | 1.04         | 1.012        | 0.985        | 1.04         | 1.013        | 0.984        | 1.042        | 1.011        | 0.984        | 1.039        | 1.011        | 0.984        | 1.039        |
| lag11 | 1.007        | 0.981        | 1.034        | 1.006        | 0.98         | 1.033        | 1.007        | 0.979        | 1.036        | 1.006        | 0.98         | 1.033        | 1.006        | 0.979        | 1.032        |
| lag12 | 1.003        | 0.978        | 1.028        | 1.002        | 0.977        | 1.028        | 1.003        | 0.976        | 1.031        | 1.002        | 0.977        | 1.027        | 1.001        | 0.976        | 1.027        |
| lag13 | 0.999        | 0.976        | 1.023        | 0.999        | 0.976        | 1.023        | 1            | 0.975        | 1.027        | 0.999        | 0.975        | 1.023        | 0.998        | 0.975        | 1.023        |
| lag14 | 0.997        | 0.976        | 1.02         | 0.997        | 0.975        | 1.019        | 0.999        | 0.975        | 1.023        | 0.997        | 0.975        | 1.019        | 0.997        | 0.975        | 1.019        |
| lag15 | 0.996        | 0.976        | 1.017        | 0.996        | 0.976        | 1.017        | 0.998        | 0.975        | 1.02         | 0.996        | 0.975        | 1.016        | 0.996        | 0.975        | 1.016        |
| lag16 | 0.996        | 0.977        | 1.015        | 0.996        | 0.977        | 1.015        | 0.997        | 0.976        | 1.018        | 0.995        | 0.976        | 1.015        | 0.995        | 0.976        | 1.015        |
| lag17 | 0.996        | 0.977        | 1.015        | 0.996        | 0.978        | 1.015        | 0.998        | 0.978        | 1.018        | 0.996        | 0.977        | 1.015        | 0.996        | 0.977        | 1.015        |
| lag18 | 0.996        | 0.977        | 1.016        | 0.997        | 0.978        | 1.017        | 0.998        | 0.978        | 1.019        | 0.997        | 0.977        | 1.017        | 0.997        | 0.977        | 1.017        |
| lag19 | 0.997        | 0.975        | 1.02         | 0.998        | 0.977        | 1.021        | 1            | 0.977        | 1.022        | 0.998        | 0.976        | 1.02         | 0.998        | 0.976        | 1.02         |
| lag20 | 0.998        | 0.973        | 1.024        | 1            | 0.975        | 1.026        | 1.001        | 0.976        | 1.027        | 0.999        | 0.974        | 1.025        | 0.999        | 0.974        | 1.026        |
| lag21 | 1            | 0.97         | 1.03         | 1.002        | 0.972        | 1.032        | 1.002        | 0.973        | 1.033        | 1.001        | 0.971        | 1.031        | 1.001        | 0.971        | 1.032        |

RR: relative risk; UCI: upper confidence interval; LCI: lower confidence interval; SO<sub>2</sub>: sulfur dioxide.**Bold:** P<0.05



**Table S12.** The sensitivity analysis about the changes of *df* for meteorological factors (1-5) for NO<sub>2</sub>.

| Lag   | df=1         |              |              | df=2         |              |              | df=3         |              |              | df=4         |              |              | df=5         |              |              |
|-------|--------------|--------------|--------------|--------------|--------------|--------------|--------------|--------------|--------------|--------------|--------------|--------------|--------------|--------------|--------------|
|       | RR           | LCI          | UCI          |
| lag0  | 1.004        | 0.928        | 1.087        | 1.003        | 0.927        | 1.085        | 1.002        | 0.926        | 1.085        | 0.999        | 0.923        | 1.081        | 1            | 0.923        | 1.083        |
| lag1  | 1.028        | 0.98         | 1.079        | 1.028        | 0.98         | 1.079        | 1.028        | 0.98         | 1.079        | 1.025        | 0.976        | 1.076        | 1.025        | 0.976        | 1.076        |
| lag2  | <b>1.046</b> | <b>1.001</b> | <b>1.094</b> | <b>1.047</b> | <b>1.002</b> | <b>1.095</b> | <b>1.047</b> | <b>1.001</b> | <b>1.095</b> | 1.044        | 0.998        | 1.092        | 1.044        | 0.998        | 1.092        |
| lag3  | <b>1.056</b> | <b>1.007</b> | <b>1.107</b> | <b>1.058</b> | <b>1.009</b> | <b>1.109</b> | <b>1.057</b> | <b>1.009</b> | <b>1.109</b> | <b>1.055</b> | <b>1.006</b> | <b>1.106</b> | <b>1.054</b> | <b>1.005</b> | <b>1.106</b> |
| lag4  | <b>1.059</b> | <b>1.012</b> | <b>1.107</b> | <b>1.061</b> | <b>1.015</b> | <b>1.11</b>  | <b>1.061</b> | <b>1.015</b> | <b>1.11</b>  | <b>1.059</b> | <b>1.012</b> | <b>1.108</b> | <b>1.058</b> | <b>1.012</b> | <b>1.107</b> |
| lag5  | <b>1.058</b> | <b>1.017</b> | <b>1.1</b>   | <b>1.061</b> | <b>1.02</b>  | <b>1.104</b> | <b>1.061</b> | <b>1.019</b> | <b>1.104</b> | <b>1.059</b> | <b>1.017</b> | <b>1.102</b> | <b>1.058</b> | <b>1.017</b> | <b>1.102</b> |
| lag6  | <b>1.055</b> | <b>1.017</b> | <b>1.093</b> | <b>1.058</b> | <b>1.021</b> | <b>1.097</b> | <b>1.058</b> | <b>1.02</b>  | <b>1.097</b> | <b>1.056</b> | <b>1.018</b> | <b>1.096</b> | <b>1.056</b> | <b>1.018</b> | <b>1.096</b> |
| lag7  | <b>1.051</b> | <b>1.014</b> | <b>1.088</b> | <b>1.055</b> | <b>1.018</b> | <b>1.093</b> | <b>1.055</b> | <b>1.018</b> | <b>1.093</b> | <b>1.053</b> | <b>1.016</b> | <b>1.092</b> | <b>1.053</b> | <b>1.016</b> | <b>1.092</b> |
| lag8  | <b>1.046</b> | <b>1.009</b> | <b>1.084</b> | <b>1.05</b>  | <b>1.013</b> | <b>1.089</b> | <b>1.05</b>  | <b>1.013</b> | <b>1.089</b> | <b>1.049</b> | <b>1.011</b> | <b>1.088</b> | <b>1.049</b> | <b>1.011</b> | <b>1.088</b> |
| lag9  | <b>1.041</b> | <b>1.004</b> | <b>1.08</b>  | <b>1.045</b> | <b>1.008</b> | <b>1.085</b> | <b>1.045</b> | <b>1.007</b> | <b>1.085</b> | <b>1.044</b> | <b>1.006</b> | <b>1.084</b> | <b>1.044</b> | <b>1.006</b> | <b>1.084</b> |
| lag10 | 1.036        | 0.998        | 1.075        | <b>1.04</b>  | <b>1.002</b> | <b>1.079</b> | <b>1.04</b>  | <b>1.002</b> | <b>1.08</b>  | 1.039        | 1            | 1.079        | 1.039        | 1            | 1.079        |
| lag11 | 1.03         | 0.992        | 1.068        | 1.034        | 0.996        | 1.073        | 1.034        | 0.996        | 1.073        | 1.033        | 0.994        | 1.073        | 1.033        | 0.994        | 1.073        |
| lag12 | 1.023        | 0.986        | 1.061        | 1.027        | 0.99         | 1.065        | 1.027        | 0.99         | 1.065        | 1.026        | 0.989        | 1.065        | 1.026        | 0.988        | 1.065        |
| lag13 | 1.016        | 0.981        | 1.053        | 1.02         | 0.984        | 1.056        | 1.02         | 0.984        | 1.056        | 1.019        | 0.983        | 1.056        | 1.019        | 0.983        | 1.056        |
| lag14 | 1.009        | 0.975        | 1.044        | 1.012        | 0.978        | 1.047        | 1.012        | 0.978        | 1.047        | 1.011        | 0.977        | 1.047        | 1.011        | 0.977        | 1.047        |
| lag15 | 1.001        | 0.969        | 1.035        | 1.004        | 0.972        | 1.038        | 1.004        | 0.972        | 1.038        | 1.003        | 0.97         | 1.038        | 1.003        | 0.97         | 1.038        |
| lag16 | 0.994        | 0.962        | 1.026        | 0.996        | 0.964        | 1.029        | 0.996        | 0.964        | 1.029        | 0.995        | 0.963        | 1.029        | 0.995        | 0.963        | 1.029        |
| lag17 | 0.986        | 0.953        | 1.019        | 0.988        | 0.955        | 1.021        | 0.988        | 0.955        | 1.021        | 0.987        | 0.954        | 1.021        | 0.987        | 0.954        | 1.021        |
| lag18 | 0.978        | 0.943        | 1.013        | 0.979        | 0.945        | 1.015        | 0.979        | 0.945        | 1.014        | 0.978        | 0.944        | 1.014        | 0.978        | 0.944        | 1.014        |
| lag19 | 0.969        | 0.932        | 1.008        | 0.971        | 0.933        | 1.01         | 0.97         | 0.933        | 1.009        | 0.97         | 0.932        | 1.009        | 0.97         | 0.932        | 1.009        |
| lag20 | 0.961        | 0.92         | 1.005        | 0.962        | 0.92         | 1.006        | 0.962        | 0.92         | 1.005        | 0.961        | 0.919        | 1.005        | 0.961        | 0.919        | 1.005        |
| lag21 | 0.953        | 0.906        | 1.003        | 0.954        | 0.907        | 1.003        | 0.953        | 0.906        | 1.002        | 0.952        | 0.905        | 1.002        | 0.952        | 0.905        | 1.002        |

RR: relative risk; UCI: upper confidence interval; LCI: lower confidence interval; NO<sub>2</sub>: nitrogen dioxide.**Bold:** P<0.05

**Table S13.** The sensitivity analysis about the changes of *df* for meteorological factors (1-5) for PM<sub>2.5</sub>.

| Lag   | df=1         |              |              | df=2         |              |              | df=3  |       |       | df=4  |       |       | df=5  |       |       |
|-------|--------------|--------------|--------------|--------------|--------------|--------------|-------|-------|-------|-------|-------|-------|-------|-------|-------|
|       | RR           | LCI          | UCI          | RR           | LCI          | UCI          | RR    | LCI   | UCI   | RR    | LCI   | UCI   | RR    | LCI   | UCI   |
| lag0  | 0.997        | 0.861        | 1.156        | 0.99         | 0.853        | 1.148        | 0.991 | 0.854 | 1.15  | 0.995 | 0.857 | 1.155 | 1     | 0.861 | 1.161 |
| lag1  | 1.034        | 0.948        | 1.126        | 1.027        | 0.941        | 1.12         | 1.027 | 0.941 | 1.121 | 1.03  | 0.943 | 1.125 | 1.034 | 0.946 | 1.129 |
| lag2  | 1.06         | 0.982        | 1.143        | 1.054        | 0.976        | 1.138        | 1.054 | 0.975 | 1.138 | 1.055 | 0.977 | 1.14  | 1.058 | 0.979 | 1.143 |
| lag3  | 1.072        | 0.989        | 1.162        | 1.067        | 0.984        | 1.157        | 1.067 | 0.983 | 1.157 | 1.067 | 0.984 | 1.158 | 1.069 | 0.985 | 1.161 |
| lag4  | 1.075        | 0.996        | 1.16         | 1.071        | 0.991        | 1.156        | 1.07  | 0.99  | 1.156 | 1.07  | 0.99  | 1.156 | 1.071 | 0.991 | 1.158 |
| lag5  | <b>1.072</b> | <b>1.002</b> | <b>1.146</b> | 1.068        | 0.998        | 1.143        | 1.068 | 0.997 | 1.143 | 1.066 | 0.996 | 1.142 | 1.068 | 0.997 | 1.144 |
| lag6  | <b>1.067</b> | <b>1.004</b> | <b>1.134</b> | <b>1.064</b> | <b>1.001</b> | <b>1.131</b> | 1.064 | 1     | 1.132 | 1.062 | 0.998 | 1.13  | 1.064 | 0.999 | 1.132 |
| lag7  | <b>1.063</b> | <b>1.002</b> | <b>1.128</b> | 1.061        | 1            | 1.126        | 1.061 | 0.999 | 1.127 | 1.059 | 0.996 | 1.125 | 1.06  | 0.998 | 1.127 |
| lag8  | 1.06         | 0.999        | 1.126        | 1.059        | 0.997        | 1.124        | 1.058 | 0.996 | 1.125 | 1.056 | 0.993 | 1.123 | 1.057 | 0.994 | 1.125 |
| lag9  | 1.058        | 0.995        | 1.124        | 1.057        | 0.994        | 1.123        | 1.056 | 0.992 | 1.124 | 1.054 | 0.99  | 1.122 | 1.055 | 0.991 | 1.124 |
| lag10 | 1.056        | 0.992        | 1.123        | 1.055        | 0.992        | 1.122        | 1.055 | 0.99  | 1.123 | 1.052 | 0.988 | 1.121 | 1.054 | 0.989 | 1.123 |
| lag11 | 1.054        | 0.991        | 1.121        | 1.054        | 0.991        | 1.121        | 1.053 | 0.989 | 1.122 | 1.051 | 0.987 | 1.12  | 1.053 | 0.988 | 1.122 |
| lag12 | 1.053        | 0.991        | 1.119        | 1.053        | 0.991        | 1.119        | 1.053 | 0.99  | 1.119 | 1.051 | 0.988 | 1.118 | 1.053 | 0.989 | 1.12  |
| lag13 | 1.052        | 0.993        | 1.116        | 1.053        | 0.993        | 1.116        | 1.052 | 0.992 | 1.117 | 1.051 | 0.99  | 1.116 | 1.053 | 0.992 | 1.118 |
| lag14 | 1.052        | 0.995        | 1.113        | 1.053        | 0.996        | 1.114        | 1.052 | 0.994 | 1.114 | 1.052 | 0.993 | 1.114 | 1.053 | 0.995 | 1.116 |
| lag15 | 1.052        | 0.997        | 1.111        | 1.053        | 0.998        | 1.112        | 1.053 | 0.996 | 1.112 | 1.053 | 0.996 | 1.112 | 1.054 | 0.997 | 1.114 |
| lag16 | 1.053        | 0.997        | 1.111        | 1.054        | 0.999        | 1.112        | 1.053 | 0.997 | 1.112 | 1.054 | 0.998 | 1.113 | 1.056 | 0.999 | 1.115 |
| lag17 | 1.053        | 0.996        | 1.114        | 1.055        | 0.998        | 1.115        | 1.054 | 0.996 | 1.115 | 1.055 | 0.997 | 1.117 | 1.057 | 0.999 | 1.119 |
| lag18 | 1.054        | 0.992        | 1.12         | 1.056        | 0.994        | 1.122        | 1.055 | 0.992 | 1.121 | 1.057 | 0.995 | 1.124 | 1.059 | 0.996 | 1.126 |
| lag19 | 1.055        | 0.986        | 1.129        | 1.057        | 0.988        | 1.131        | 1.056 | 0.986 | 1.13  | 1.059 | 0.989 | 1.134 | 1.061 | 0.99  | 1.136 |
| lag20 | 1.056        | 0.977        | 1.141        | 1.058        | 0.98         | 1.143        | 1.057 | 0.978 | 1.142 | 1.061 | 0.982 | 1.147 | 1.063 | 0.983 | 1.149 |
| lag21 | 1.057        | 0.968        | 1.155        | 1.059        | 0.97         | 1.157        | 1.058 | 0.968 | 1.155 | 1.063 | 0.973 | 1.162 | 1.065 | 0.974 | 1.164 |

RR: relative risk; UCI: upper confidence interval; LCI: lower confidence interval; PM<sub>2.5</sub>: particulate matter less than 2.5  $\mu$ m in aerodynamic diameter.**Bold:** P<0.05

**Table S14.** The sensitivity analysis about the changes of *df* for meteorological factors (1-5) for CO.

| Lag   | df=1         |              |              | df=2         |              |              | df=3         |              |              | df=4         |              |              | df=5         |              |              |
|-------|--------------|--------------|--------------|--------------|--------------|--------------|--------------|--------------|--------------|--------------|--------------|--------------|--------------|--------------|--------------|
|       | RR           | LCI          | UCI          |
| lag0  | 1.007        | 0.935        | 1.086        | 1.009        | 0.936        | 1.087        | 1.012        | 0.939        | 1.091        | 1.011        | 0.938        | 1.09         | 1.011        | 0.938        | 1.09         |
| lag1  | 1.01         | 0.968        | 1.053        | 1.01         | 0.969        | 1.054        | 1.013        | 0.971        | 1.057        | 1.014        | 0.972        | 1.057        | 1.014        | 0.972        | 1.058        |
| lag2  | 1.013        | 0.977        | 1.05         | 1.013        | 0.977        | 1.051        | 1.016        | 0.979        | 1.054        | 1.017        | 0.98         | 1.055        | 1.017        | 0.981        | 1.055        |
| lag3  | 1.017        | 0.978        | 1.057        | 1.017        | 0.978        | 1.057        | 1.019        | 0.98         | 1.06         | 1.021        | 0.981        | 1.061        | 1.021        | 0.982        | 1.062        |
| lag4  | 1.021        | 0.985        | 1.059        | 1.021        | 0.984        | 1.059        | 1.022        | 0.986        | 1.06         | 1.025        | 0.988        | 1.063        | 1.025        | 0.988        | 1.064        |
| lag5  | 1.025        | 0.994        | 1.057        | 1.025        | 0.994        | 1.057        | 1.026        | 0.995        | 1.058        | 1.028        | 0.997        | 1.06         | 1.029        | 0.998        | 1.061        |
| lag6  | <b>1.028</b> | <b>1.002</b> | <b>1.056</b> | <b>1.028</b> | <b>1.001</b> | <b>1.055</b> | <b>1.028</b> | <b>1.002</b> | <b>1.056</b> | <b>1.031</b> | <b>1.004</b> | <b>1.059</b> | <b>1.032</b> | <b>1.005</b> | <b>1.06</b>  |
| lag7  | <b>1.031</b> | <b>1.005</b> | <b>1.057</b> | <b>1.029</b> | <b>1.004</b> | <b>1.056</b> | <b>1.03</b>  | <b>1.004</b> | <b>1.056</b> | <b>1.033</b> | <b>1.007</b> | <b>1.059</b> | <b>1.034</b> | <b>1.008</b> | <b>1.06</b>  |
| lag8  | <b>1.032</b> | <b>1.006</b> | <b>1.058</b> | <b>1.03</b>  | <b>1.004</b> | <b>1.057</b> | <b>1.03</b>  | <b>1.005</b> | <b>1.057</b> | <b>1.033</b> | <b>1.007</b> | <b>1.06</b>  | <b>1.034</b> | <b>1.008</b> | <b>1.061</b> |
| lag9  | <b>1.032</b> | <b>1.005</b> | <b>1.059</b> | <b>1.03</b>  | <b>1.003</b> | <b>1.058</b> | <b>1.03</b>  | <b>1.003</b> | <b>1.058</b> | <b>1.033</b> | <b>1.006</b> | <b>1.061</b> | <b>1.034</b> | <b>1.007</b> | <b>1.062</b> |
| lag10 | <b>1.031</b> | <b>1.003</b> | <b>1.059</b> | <b>1.029</b> | <b>1.002</b> | <b>1.057</b> | <b>1.029</b> | <b>1.001</b> | <b>1.057</b> | <b>1.032</b> | <b>1.004</b> | <b>1.06</b>  | <b>1.033</b> | <b>1.005</b> | <b>1.062</b> |
| lag11 | <b>1.029</b> | <b>1.002</b> | <b>1.057</b> | 1.027        | 1            | 1.056        | 1.027        | 0.999        | 1.055        | <b>1.03</b>  | <b>1.002</b> | <b>1.058</b> | <b>1.031</b> | <b>1.003</b> | <b>1.06</b>  |
| lag12 | 1.027        | 1            | 1.054        | 1.025        | 0.998        | 1.053        | 1.024        | 0.997        | 1.052        | 1.027        | 1            | 1.055        | 1.028        | 1            | 1.056        |
| lag13 | 1.023        | 0.997        | 1.05         | 1.022        | 0.995        | 1.048        | 1.021        | 0.995        | 1.048        | 1.024        | 0.997        | 1.051        | 1.025        | 0.998        | 1.052        |
| lag14 | 1.02         | 0.995        | 1.045        | 1.018        | 0.993        | 1.043        | 1.017        | 0.992        | 1.043        | 1.02         | 0.994        | 1.046        | 1.021        | 0.995        | 1.047        |
| lag15 | 1.015        | 0.991        | 1.04         | 1.013        | 0.989        | 1.038        | 1.013        | 0.989        | 1.038        | 1.015        | 0.99         | 1.04         | 1.016        | 0.991        | 1.041        |
| lag16 | 1.011        | 0.987        | 1.035        | 1.009        | 0.984        | 1.033        | 1.008        | 0.984        | 1.033        | 1.01         | 0.986        | 1.035        | 1.011        | 0.987        | 1.036        |
| lag17 | 1.006        | 0.98         | 1.031        | 1.004        | 0.978        | 1.03         | 1.003        | 0.978        | 1.029        | 1.005        | 0.979        | 1.031        | 1.006        | 0.98         | 1.032        |
| lag18 | 1            | 0.973        | 1.029        | 0.998        | 0.971        | 1.027        | 0.998        | 0.97         | 1.027        | 0.999        | 0.971        | 1.028        | 1            | 0.972        | 1.029        |
| lag19 | 0.995        | 0.963        | 1.027        | 0.993        | 0.961        | 1.025        | 0.993        | 0.961        | 1.025        | 0.994        | 0.962        | 1.027        | 0.995        | 0.963        | 1.028        |
| lag20 | 0.989        | 0.953        | 1.026        | 0.987        | 0.951        | 1.024        | 0.987        | 0.951        | 1.024        | 0.988        | 0.952        | 1.026        | 0.989        | 0.953        | 1.027        |
| lag21 | 0.983        | 0.942        | 1.026        | 0.981        | 0.941        | 1.024        | 0.982        | 0.94         | 1.024        | 0.982        | 0.941        | 1.025        | 0.983        | 0.942        | 1.026        |

RR: relative risk; UCI: upper confidence interval; LCI: lower confidence interval; CO: carbon monoxide.

**Bold:** P<0.05

**Table S15.** The sensitivity analysis about the changes of *df* for meteorological factors (1-5) for O<sub>3</sub>.

| Lag   | df=1         |              |              | df=2         |              |              | df=3         |              |              | df=4         |              |              | df=5         |              |              |
|-------|--------------|--------------|--------------|--------------|--------------|--------------|--------------|--------------|--------------|--------------|--------------|--------------|--------------|--------------|--------------|
|       | RR           | LCI          | UCI          |
| lag0  | 1.02         | 0.965        | 1.077        | 1.021        | 0.966        | 1.079        | 1.025        | 0.97         | 1.083        | 1.025        | 0.969        | 1.083        | 1.025        | 0.97         | 1.084        |
| lag1  | 1.001        | 0.971        | 1.032        | 1.002        | 0.972        | 1.034        | 1.004        | 0.974        | 1.036        | 1.004        | 0.974        | 1.036        | 1.005        | 0.974        | 1.036        |
| lag2  | 0.99         | 0.963        | 1.016        | 0.991        | 0.964        | 1.017        | 0.991        | 0.965        | 1.018        | 0.991        | 0.965        | 1.018        | 0.991        | 0.965        | 1.018        |
| lag3  | 0.986        | 0.958        | 1.015        | 0.987        | 0.959        | 1.016        | 0.987        | 0.959        | 1.016        | 0.987        | 0.959        | 1.016        | 0.987        | 0.959        | 1.016        |
| lag4  | 0.988        | 0.961        | 1.015        | 0.988        | 0.962        | 1.016        | 0.989        | 0.962        | 1.016        | 0.988        | 0.962        | 1.015        | 0.988        | 0.962        | 1.016        |
| lag5  | 0.992        | 0.969        | 1.015        | 0.993        | 0.97         | 1.016        | 0.993        | 0.97         | 1.016        | 0.993        | 0.97         | 1.016        | 0.993        | 0.97         | 1.016        |
| lag6  | 0.997        | 0.977        | 1.017        | 0.997        | 0.977        | 1.017        | 0.997        | 0.977        | 1.018        | 0.997        | 0.977        | 1.017        | 0.997        | 0.977        | 1.018        |
| lag7  | 1            | 0.981        | 1.019        | 1            | 0.981        | 1.02         | 1.001        | 0.981        | 1.021        | 1            | 0.981        | 1.02         | 1            | 0.981        | 1.02         |
| lag8  | 1.002        | 0.982        | 1.022        | 1.002        | 0.983        | 1.023        | 1.003        | 0.983        | 1.023        | 1.002        | 0.983        | 1.023        | 1.003        | 0.983        | 1.023        |
| lag9  | 1.003        | 0.983        | 1.024        | 1.004        | 0.983        | 1.024        | 1.004        | 0.983        | 1.025        | 1.003        | 0.983        | 1.024        | 1.004        | 0.983        | 1.025        |
| lag10 | 1.003        | 0.982        | 1.025        | 1.004        | 0.983        | 1.025        | 1.004        | 0.983        | 1.026        | 1.003        | 0.982        | 1.025        | 1.004        | 0.983        | 1.025        |
| lag11 | 1.003        | 0.982        | 1.024        | 1.003        | 0.982        | 1.024        | 1.003        | 0.982        | 1.025        | 1.003        | 0.982        | 1.024        | 1.003        | 0.982        | 1.024        |
| lag12 | 1.001        | 0.981        | 1.022        | 1.001        | 0.981        | 1.022        | 1.002        | 0.981        | 1.022        | 1.001        | 0.98         | 1.022        | 1.001        | 0.981        | 1.022        |
| lag13 | 0.999        | 0.979        | 1.019        | 0.999        | 0.979        | 1.019        | 0.999        | 0.98         | 1.019        | 0.998        | 0.979        | 1.018        | 0.999        | 0.979        | 1.019        |
| lag14 | 0.996        | 0.977        | 1.015        | 0.996        | 0.977        | 1.015        | 0.996        | 0.977        | 1.015        | 0.995        | 0.977        | 1.014        | 0.996        | 0.977        | 1.015        |
| lag15 | 0.992        | 0.974        | 1.011        | 0.993        | 0.975        | 1.011        | 0.992        | 0.974        | 1.011        | 0.992        | 0.973        | 1.01         | 0.992        | 0.974        | 1.01         |
| lag16 | 0.988        | 0.97         | 1.007        | 0.989        | 0.971        | 1.007        | 0.988        | 0.97         | 1.007        | 0.987        | 0.969        | 1.006        | 0.988        | 0.969        | 1.006        |
| lag17 | 0.984        | 0.965        | 1.004        | 0.984        | 0.965        | 1.004        | 0.984        | 0.965        | 1.003        | 0.983        | 0.964        | 1.003        | 0.983        | 0.964        | 1.003        |
| lag18 | 0.979        | 0.958        | 1.001        | 0.98         | 0.958        | 1.002        | 0.979        | 0.958        | 1.001        | 0.978        | 0.957        | 1            | 0.978        | 0.957        | 1            |
| lag19 | 0.974        | 0.95         | 1            | 0.975        | 0.95         | 1            | <b>0.974</b> | <b>0.949</b> | <b>0.999</b> | <b>0.973</b> | <b>0.948</b> | <b>0.998</b> | <b>0.973</b> | <b>0.948</b> | <b>0.998</b> |
| lag20 | <b>0.969</b> | <b>0.941</b> | <b>0.999</b> | <b>0.97</b>  | <b>0.942</b> | <b>0.999</b> | <b>0.969</b> | <b>0.94</b>  | <b>0.998</b> | <b>0.968</b> | <b>0.939</b> | <b>0.997</b> | <b>0.968</b> | <b>0.939</b> | <b>0.997</b> |
| lag21 | <b>0.964</b> | <b>0.932</b> | <b>0.998</b> | <b>0.965</b> | <b>0.932</b> | <b>0.999</b> | <b>0.963</b> | <b>0.931</b> | <b>0.997</b> | <b>0.963</b> | <b>0.93</b>  | <b>0.996</b> | <b>0.962</b> | <b>0.93</b>  | <b>0.996</b> |

RR: relative risk; UCI: upper confidence interval; LCI: lower confidence interval; O<sub>3</sub>: ozone.**Bold:** P<0.05

**Table S16.** The sensitivity analysis about the different lag days to test the delayed effects of SO<sub>2</sub>.

| Lag   | lag=19 days  |              |              | lag=21 days  |              |              | lag=23 days  |              |              |
|-------|--------------|--------------|--------------|--------------|--------------|--------------|--------------|--------------|--------------|
|       | RR           | LCI          | UCI          | RR           | LCI          | UCI          | RR           | LCI          | UCI          |
| lag0  | 0.998        | 0.921        | 1.082        | 1.001        | 0.925        | 1.083        | 1.009        | 0.934        | 1.09         |
| lag1  | 1.048        | 0.999        | 1.098        | 1.044        | 0.995        | 1.095        | 1.05         | 1            | 1.102        |
| lag2  | <b>1.078</b> | <b>1.035</b> | <b>1.124</b> | <b>1.072</b> | <b>1.028</b> | <b>1.118</b> | <b>1.078</b> | <b>1.035</b> | <b>1.123</b> |
| lag3  | <b>1.085</b> | <b>1.04</b>  | <b>1.133</b> | <b>1.081</b> | <b>1.035</b> | <b>1.129</b> | <b>1.088</b> | <b>1.043</b> | <b>1.135</b> |
| lag4  | <b>1.076</b> | <b>1.035</b> | <b>1.119</b> | <b>1.076</b> | <b>1.032</b> | <b>1.121</b> | <b>1.085</b> | <b>1.04</b>  | <b>1.131</b> |
| lag5  | <b>1.06</b>  | <b>1.026</b> | <b>1.095</b> | <b>1.063</b> | <b>1.026</b> | <b>1.101</b> | <b>1.073</b> | <b>1.033</b> | <b>1.115</b> |
| lag6  | <b>1.045</b> | <b>1.016</b> | <b>1.074</b> | <b>1.049</b> | <b>1.017</b> | <b>1.082</b> | <b>1.06</b>  | <b>1.024</b> | <b>1.096</b> |
| lag7  | <b>1.032</b> | <b>1.006</b> | <b>1.058</b> | <b>1.037</b> | <b>1.007</b> | <b>1.068</b> | <b>1.047</b> | <b>1.015</b> | <b>1.081</b> |
| lag8  | 1.022        | 0.997        | 1.047        | 1.027        | 0.998        | 1.057        | <b>1.037</b> | <b>1.006</b> | <b>1.069</b> |
| lag9  | 1.013        | 0.989        | 1.038        | 1.019        | 0.99         | 1.049        | 1.028        | 0.998        | 1.059        |
| lag10 | 1.007        | 0.984        | 1.031        | 1.013        | 0.984        | 1.042        | 1.02         | 0.991        | 1.051        |
| lag11 | 1.002        | 0.98         | 1.025        | 1.007        | 0.979        | 1.036        | 1.014        | 0.985        | 1.044        |
| lag12 | 0.999        | 0.977        | 1.02         | 1.003        | 0.976        | 1.031        | 1.009        | 0.981        | 1.038        |
| lag13 | 0.996        | 0.976        | 1.017        | 1            | 0.975        | 1.027        | 1.005        | 0.978        | 1.033        |
| lag14 | 0.995        | 0.976        | 1.015        | 0.999        | 0.975        | 1.023        | 1.002        | 0.977        | 1.028        |
| lag15 | 0.995        | 0.976        | 1.014        | 0.998        | 0.975        | 1.02         | 1            | 0.976        | 1.024        |
| lag16 | 0.996        | 0.976        | 1.016        | 0.997        | 0.976        | 1.018        | 0.999        | 0.976        | 1.021        |
| lag17 | 0.997        | 0.975        | 1.019        | 0.998        | 0.978        | 1.018        | 0.998        | 0.977        | 1.019        |
| lag18 | 0.998        | 0.973        | 1.024        | 0.998        | 0.978        | 1.019        | 0.998        | 0.978        | 1.018        |
| lag19 | 1            | 0.97         | 1.03         | 1            | 0.977        | 1.022        | 0.998        | 0.978        | 1.019        |
| lag20 |              |              |              | 1.001        | 0.976        | 1.027        | 0.999        | 0.978        | 1.021        |
| lag21 |              |              |              | 1.002        | 0.973        | 1.033        | 1            | 0.976        | 1.025        |
| lag22 |              |              |              |              |              |              | 1.002        | 0.974        | 1.03         |
| lag23 |              |              |              |              |              |              | 1.003        | 0.972        | 1.035        |

RR: relative risk; UCI: upper confidence interval; LCI: lower confidence interval; SO<sub>2</sub>: sulfur dioxide.

**Bold:** P<0.05

**Table S17.** The sensitivity analysis about the different lag days to test the delayed effects of NO<sub>2</sub>.

| Lag   | lag=19 days  |              |              | lag=21 days  |              |              | lag=23 days  |              |              |
|-------|--------------|--------------|--------------|--------------|--------------|--------------|--------------|--------------|--------------|
|       | RR           | LCI          | UCI          | RR           | LCI          | UCI          | RR           | LCI          | UCI          |
| lag0  | 1.014        | 0.936        | 1.099        | 1.002        | 0.926        | 1.085        | 1.001        | 0.926        | 1.083        |
| lag1  | 1.035        | 0.987        | 1.085        | 1.028        | 0.98         | 1.079        | 1.03         | 0.982        | 1.081        |
| lag2  | <b>1.05</b>  | <b>1.003</b> | <b>1.1</b>   | <b>1.047</b> | <b>1.001</b> | <b>1.095</b> | <b>1.051</b> | <b>1.007</b> | <b>1.098</b> |
| lag3  | <b>1.06</b>  | <b>1.01</b>  | <b>1.112</b> | <b>1.057</b> | <b>1.009</b> | <b>1.109</b> | <b>1.062</b> | <b>1.014</b> | <b>1.112</b> |
| lag4  | <b>1.064</b> | <b>1.018</b> | <b>1.112</b> | <b>1.061</b> | <b>1.015</b> | <b>1.11</b>  | <b>1.064</b> | <b>1.016</b> | <b>1.113</b> |
| lag5  | <b>1.065</b> | <b>1.025</b> | <b>1.107</b> | <b>1.061</b> | <b>1.019</b> | <b>1.104</b> | <b>1.06</b>  | <b>1.018</b> | <b>1.105</b> |
| lag6  | <b>1.065</b> | <b>1.027</b> | <b>1.103</b> | <b>1.058</b> | <b>1.02</b>  | <b>1.097</b> | <b>1.054</b> | <b>1.016</b> | <b>1.094</b> |
| lag7  | <b>1.063</b> | <b>1.025</b> | <b>1.102</b> | <b>1.055</b> | <b>1.018</b> | <b>1.093</b> | <b>1.048</b> | <b>1.012</b> | <b>1.086</b> |
| lag8  | <b>1.059</b> | <b>1.021</b> | <b>1.099</b> | <b>1.05</b>  | <b>1.013</b> | <b>1.089</b> | <b>1.042</b> | <b>1.006</b> | <b>1.08</b>  |
| lag9  | <b>1.055</b> | <b>1.016</b> | <b>1.096</b> | <b>1.045</b> | <b>1.007</b> | <b>1.085</b> | 1.036        | 0.999        | 1.074        |
| lag10 | <b>1.05</b>  | <b>1.011</b> | <b>1.09</b>  | <b>1.04</b>  | <b>1.002</b> | <b>1.08</b>  | 1.03         | 0.993        | 1.069        |
| lag11 | <b>1.044</b> | <b>1.006</b> | <b>1.083</b> | 1.034        | 0.996        | 1.073        | 1.024        | 0.986        | 1.062        |
| lag12 | <b>1.037</b> | <b>1.001</b> | <b>1.075</b> | 1.027        | 0.99         | 1.065        | 1.017        | 0.98         | 1.056        |
| lag13 | 1.03         | 0.995        | 1.065        | 1.02         | 0.984        | 1.056        | 1.011        | 0.975        | 1.049        |
| lag14 | 1.022        | 0.989        | 1.056        | 1.012        | 0.978        | 1.047        | 1.005        | 0.97         | 1.041        |
| lag15 | 1.013        | 0.98         | 1.048        | 1.004        | 0.972        | 1.038        | 0.999        | 0.965        | 1.033        |
| lag16 | 1.005        | 0.97         | 1.041        | 0.996        | 0.964        | 1.029        | 0.993        | 0.96         | 1.026        |
| lag17 | 0.996        | 0.957        | 1.036        | 0.988        | 0.955        | 1.021        | 0.986        | 0.955        | 1.019        |
| lag18 | 0.987        | 0.943        | 1.032        | 0.979        | 0.945        | 1.014        | 0.98         | 0.949        | 1.012        |
| lag19 | 0.978        | 0.928        | 1.03         | 0.97         | 0.933        | 1.009        | 0.974        | 0.942        | 1.007        |
| lag20 |              |              |              | 0.962        | 0.92         | 1.005        | 0.968        | 0.934        | 1.003        |
| lag21 |              |              |              | 0.953        | 0.906        | 1.002        | 0.962        | 0.925        | 1            |
| lag22 |              |              |              |              |              |              | 0.956        | 0.915        | 0.999        |
| lag23 |              |              |              |              |              |              | 0.95         | 0.904        | 0.998        |

RR: relative risk; UCI: upper confidence interval; LCI: lower confidence interval; NO<sub>2</sub>: nitrogen dioxide.

**Bold:** P<0.05

**Table S18.** The sensitivity analysis about the different lag days to test the delayed effects of PM<sub>2.5</sub>.

| Lag   | lag=19 days |       |       | lag=21 days |       |       | lag=23 days  |              |              |
|-------|-------------|-------|-------|-------------|-------|-------|--------------|--------------|--------------|
|       | RR          | LCI   | UCI   | RR          | LCI   | UCI   | RR           | LCI          | UCI          |
| lag0  | 0.988       | 0.849 | 1.15  | 0.991       | 0.854 | 1.15  | 0.997        | 0.861        | 1.154        |
| lag1  | 1.024       | 0.939 | 1.117 | 1.027       | 0.941 | 1.121 | 1.032        | 0.945        | 1.128        |
| lag2  | 1.048       | 0.966 | 1.137 | 1.054       | 0.975 | 1.138 | 1.059        | 0.983        | 1.142        |
| lag3  | 1.058       | 0.972 | 1.151 | 1.067       | 0.983 | 1.157 | 1.074        | 0.992        | 1.162        |
| lag4  | 1.057       | 0.979 | 1.142 | 1.07        | 0.99  | 1.156 | 1.079        | 0.998        | 1.166        |
| lag5  | 1.052       | 0.986 | 1.124 | 1.068       | 0.997 | 1.143 | <b>1.078</b> | <b>1.004</b> | <b>1.156</b> |
| lag6  | 1.047       | 0.986 | 1.112 | 1.064       | 1     | 1.132 | <b>1.074</b> | <b>1.008</b> | <b>1.144</b> |
| lag7  | 1.043       | 0.982 | 1.107 | 1.061       | 0.999 | 1.127 | <b>1.071</b> | <b>1.008</b> | <b>1.137</b> |
| lag8  | 1.039       | 0.977 | 1.105 | 1.058       | 0.996 | 1.125 | <b>1.068</b> | <b>1.005</b> | <b>1.134</b> |
| lag9  | 1.037       | 0.974 | 1.103 | 1.056       | 0.992 | 1.124 | <b>1.065</b> | <b>1.002</b> | <b>1.132</b> |
| lag10 | 1.034       | 0.972 | 1.101 | 1.055       | 0.99  | 1.123 | 1.063        | 0.999        | 1.131        |
| lag11 | 1.033       | 0.972 | 1.098 | 1.053       | 0.989 | 1.122 | 1.061        | 0.997        | 1.13         |
| lag12 | 1.032       | 0.974 | 1.094 | 1.053       | 0.99  | 1.119 | 1.06         | 0.996        | 1.128        |
| lag13 | 1.032       | 0.976 | 1.091 | 1.052       | 0.992 | 1.117 | 1.059        | 0.996        | 1.125        |
| lag14 | 1.032       | 0.977 | 1.09  | 1.052       | 0.994 | 1.114 | 1.058        | 0.997        | 1.122        |
| lag15 | 1.032       | 0.976 | 1.091 | 1.053       | 0.996 | 1.112 | 1.057        | 0.998        | 1.119        |
| lag16 | 1.033       | 0.972 | 1.097 | 1.053       | 0.997 | 1.112 | 1.057        | 1            | 1.117        |
| lag17 | 1.033       | 0.965 | 1.106 | 1.054       | 0.996 | 1.115 | 1.056        | 1.001        | 1.116        |
| lag18 | 1.034       | 0.955 | 1.12  | 1.055       | 0.992 | 1.121 | 1.056        | 1            | 1.116        |
| lag19 | 1.035       | 0.944 | 1.135 | 1.056       | 0.986 | 1.13  | 1.056        | 0.998        | 1.119        |
| lag20 |             |       |       | 1.057       | 0.978 | 1.142 | 1.057        | 0.993        | 1.124        |
| lag21 |             |       |       | 1.058       | 0.968 | 1.155 | 1.057        | 0.987        | 1.131        |
| lag22 |             |       |       |             |       |       | 1.057        | 0.979        | 1.141        |
| lag23 |             |       |       |             |       |       | 1.057        | 0.971        | 1.152        |

RR: relative risk; UCI: upper confidence interval; LCI: lower confidence interval; PM<sub>2.5</sub>: particulate matter less than 2.5 µm in aerodynamic diameter.**Bold:** P<0.05

**Table S19.** The sensitivity analysis about the different lag days to test the delayed effects of CO.

| Lag   | lag=19 days  |              |              | lag=21 days  |              |              | lag=23 days  |              |              |
|-------|--------------|--------------|--------------|--------------|--------------|--------------|--------------|--------------|--------------|
|       | RR           | LCI          | UCI          | RR           | LCI          | UCI          | RR           | LCI          | UCI          |
| lag0  | 1.011        | 0.936        | 1.091        | 1.012        | 0.939        | 1.091        | 1.014        | 0.942        | 1.092        |
| lag1  | 1.008        | 0.967        | 1.051        | 1.013        | 0.971        | 1.057        | 1.018        | 0.975        | 1.063        |
| lag2  | 1.008        | 0.97         | 1.047        | 1.016        | 0.979        | 1.054        | 1.021        | 0.986        | 1.058        |
| lag3  | 1.012        | 0.972        | 1.054        | 1.019        | 0.98         | 1.06         | 1.023        | 0.986        | 1.063        |
| lag4  | 1.018        | 0.982        | 1.055        | 1.022        | 0.986        | 1.06         | 1.025        | 0.988        | 1.063        |
| lag5  | 1.023        | 0.994        | 1.054        | 1.026        | 0.995        | 1.058        | 1.026        | 0.994        | 1.059        |
| lag6  | <b>1.028</b> | <b>1.001</b> | <b>1.055</b> | <b>1.028</b> | <b>1.002</b> | <b>1.056</b> | 1.027        | 0.999        | 1.055        |
| lag7  | <b>1.03</b>  | <b>1.004</b> | <b>1.057</b> | <b>1.03</b>  | <b>1.004</b> | <b>1.056</b> | <b>1.027</b> | <b>1.001</b> | <b>1.053</b> |
| lag8  | <b>1.032</b> | <b>1.004</b> | <b>1.06</b>  | <b>1.03</b>  | <b>1.005</b> | <b>1.057</b> | <b>1.026</b> | <b>1.001</b> | <b>1.052</b> |
| lag9  | <b>1.031</b> | <b>1.003</b> | <b>1.06</b>  | <b>1.03</b>  | <b>1.003</b> | <b>1.058</b> | 1.026        | 1            | 1.052        |
| lag10 | <b>1.03</b>  | <b>1.002</b> | <b>1.059</b> | <b>1.029</b> | <b>1.001</b> | <b>1.057</b> | 1.025        | 0.998        | 1.052        |
| lag11 | 1.027        | 1            | 1.056        | 1.027        | 0.999        | 1.055        | 1.024        | 0.997        | 1.051        |
| lag12 | 1.024        | 0.997        | 1.051        | 1.024        | 0.997        | 1.052        | 1.022        | 0.995        | 1.05         |
| lag13 | 1.019        | 0.994        | 1.045        | 1.021        | 0.995        | 1.048        | 1.02         | 0.994        | 1.048        |
| lag14 | 1.014        | 0.989        | 1.039        | 1.017        | 0.992        | 1.043        | 1.018        | 0.993        | 1.045        |
| lag15 | 1.008        | 0.983        | 1.034        | 1.013        | 0.989        | 1.038        | 1.016        | 0.991        | 1.042        |
| lag16 | 1.002        | 0.974        | 1.03         | 1.008        | 0.984        | 1.033        | 1.014        | 0.99         | 1.039        |
| lag17 | 0.995        | 0.964        | 1.027        | 1.003        | 0.978        | 1.029        | 1.012        | 0.988        | 1.036        |
| lag18 | 0.988        | 0.952        | 1.026        | 0.998        | 0.97         | 1.027        | 1.009        | 0.985        | 1.034        |
| lag19 | 0.981        | 0.939        | 1.026        | 0.993        | 0.961        | 1.025        | 1.006        | 0.98         | 1.033        |
| lag20 |              |              |              | 0.987        | 0.951        | 1.024        | 1.003        | 0.975        | 1.032        |
| lag21 |              |              |              | 0.982        | 0.94         | 1.024        | 1.001        | 0.969        | 1.033        |
| lag22 |              |              |              |              |              |              | 0.998        | 0.962        | 1.035        |
| lag23 |              |              |              |              |              |              | 0.995        | 0.954        | 1.037        |

RR: relative risk; UCI: upper confidence interval; LCI: lower confidence interval; CO: carbon monoxide.

pm



**Bold:** P<0.05

**Table S20.** The sensitivity analysis about the different lag days to test the delayed effects of O<sub>3</sub>.

| Lag   | lag=19 days |       |       | lag=21 days  |              |              | lag=23 days |       |       |
|-------|-------------|-------|-------|--------------|--------------|--------------|-------------|-------|-------|
|       | RR          | LCI   | UCI   | RR           | LCI          | UCI          | RR          | LCI   | UCI   |
| lag0  | 1.022       | 0.965 | 1.081 | 1.025        | 0.97         | 1.083        | 1.019       | 0.965 | 1.076 |
| lag1  | 1.003       | 0.973 | 1.034 | 1.004        | 0.974        | 1.036        | 1.005       | 0.974 | 1.037 |
| lag2  | 0.992       | 0.964 | 1.02  | 0.991        | 0.965        | 1.018        | 0.996       | 0.971 | 1.022 |
| lag3  | 0.988       | 0.959 | 1.019 | 0.987        | 0.959        | 1.016        | 0.992       | 0.965 | 1.02  |
| lag4  | 0.991       | 0.964 | 1.018 | 0.989        | 0.962        | 1.016        | 0.992       | 0.965 | 1.019 |
| lag5  | 0.995       | 0.973 | 1.018 | 0.993        | 0.97         | 1.016        | 0.993       | 0.97  | 1.017 |
| lag6  | 0.999       | 0.979 | 1.02  | 0.997        | 0.977        | 1.018        | 0.996       | 0.976 | 1.017 |
| lag7  | 1.002       | 0.982 | 1.023 | 1.001        | 0.981        | 1.021        | 0.998       | 0.979 | 1.017 |
| lag8  | 1.004       | 0.983 | 1.025 | 1.003        | 0.983        | 1.023        | 0.999       | 0.98  | 1.019 |
| lag9  | 1.005       | 0.983 | 1.027 | 1.004        | 0.983        | 1.025        | 1           | 0.98  | 1.02  |
| lag10 | 1.005       | 0.983 | 1.027 | 1.004        | 0.983        | 1.026        | 1           | 0.98  | 1.021 |
| lag11 | 1.005       | 0.983 | 1.026 | 1.003        | 0.982        | 1.025        | 1           | 0.979 | 1.02  |
| lag12 | 1.003       | 0.983 | 1.024 | 1.002        | 0.981        | 1.022        | 0.999       | 0.979 | 1.02  |
| lag13 | 1.002       | 0.982 | 1.021 | 0.999        | 0.98         | 1.019        | 0.997       | 0.978 | 1.018 |
| lag14 | 1           | 0.981 | 1.018 | 0.996        | 0.977        | 1.015        | 0.996       | 0.976 | 1.015 |
| lag15 | 0.997       | 0.978 | 1.016 | 0.992        | 0.974        | 1.011        | 0.994       | 0.975 | 1.013 |
| lag16 | 0.994       | 0.973 | 1.015 | 0.988        | 0.97         | 1.007        | 0.991       | 0.973 | 1.009 |
| lag17 | 0.991       | 0.967 | 1.015 | 0.984        | 0.965        | 1.003        | 0.988       | 0.971 | 1.007 |
| lag18 | 0.987       | 0.96  | 1.016 | 0.979        | 0.958        | 1.001        | 0.986       | 0.967 | 1.004 |
| lag19 | 0.984       | 0.951 | 1.018 | <b>0.974</b> | <b>0.949</b> | <b>0.999</b> | 0.982       | 0.963 | 1.002 |
| lag20 |             |       |       | <b>0.969</b> | <b>0.94</b>  | <b>0.998</b> | 0.979       | 0.958 | 1.001 |
| lag21 |             |       |       | <b>0.963</b> | <b>0.931</b> | <b>0.997</b> | 0.976       | 0.951 | 1.001 |
| lag22 |             |       |       |              |              |              | 0.972       | 0.945 | 1.001 |
| lag23 |             |       |       |              |              |              | 0.969       | 0.938 | 1.001 |

RR: relative risk; UCI: upper confidence interval; LCI: lower confidence interval; O<sub>3</sub>: ozone.

**Bold:** P<0.05
